# Supplementary material for: Severe Acute Respiratory Syndrome Coronavirus 2 (SARS-CoV-2): Codon Usage and Replicative Fitness
Source: PubMed Central journal article supplement (PMC7772010; doi:10.1055/s-0040-1721080), 2020-12-02
Supplement: 10-1055-s-0040-1721080-s2000014.pdf [file 10-1055-s-0040-1721080-s2000014.pdf]

**Supplementary Table S1** Codon usage bias between human ORFeome and polyprotein ORFs from coronaviruses

| Aa  | Codon | <i>Homo sapiens</i> | 1     | 2     | 3     | 4     | 5     | 6     | 7     |
|-----|-------|---------------------|-------|-------|-------|-------|-------|-------|-------|
| Ala | GCG   | 7.37                | 2.68  | 2.96  | 2.96  | 2.25  | 2.26  | 3.53  | 5.38  |
| Ala | GCA   | 15.82               | 18.47 | 18.04 | 18.18 | 18.46 | 18.36 | 20.92 | 18.26 |
| Ala | GCT   | 18.45               | 35.66 | 35.38 | 35.24 | 37.90 | 38.00 | 37.75 | 38.92 |
| Ala | GCC   | 27.73               | 9.02  | 9.59  | 9.59  | 10.00 | 9.89  | 10.04 | 11.04 |
| Cys | TGT   | 10.58               | 27.21 | 27.35 | 27.49 | 25.93 | 26.13 | 21.77 | 19.39 |
| Cys | TGC   | 12.62               | 8.74  | 8.74  | 8.74  | 5.92  | 5.65  | 11.31 | 13.31 |
| Asp | GAT   | 21.78               | 54.55 | 54.55 | 54.84 | 35.37 | 35.46 | 36.05 | 35.95 |
| Asp | GAC   | 25.10               | 9.30  | 9.30  | 9.30  | 19.44 | 19.49 | 19.93 | 20.52 |
| Glu | GAG   | 39.59               | 15.37 | 15.08 | 15.22 | 12.96 | 13.00 | 22.76 | 18.68 |
| Glu | GAA   | 28.96               | 21.14 | 21.29 | 21.14 | 34.94 | 35.03 | 26.44 | 21.94 |
| Phe | TTT   | 17.57               | 50.18 | 49.76 | 50.61 | 35.79 | 35.88 | 28.70 | 33.26 |
| Phe | TTC   | 20.28               | 5.78  | 6.06  | 5.64  | 13.39 | 13.42 | 18.10 | 18.40 |
| Gly | GGG   | 16.47               | 3.81  | 3.81  | 3.95  | 1.41  | 1.41  | 1.98  | 3.96  |
| Gly | GGA   | 16.47               | 9.44  | 9.44  | 9.30  | 10.71 | 10.74 | 12.58 | 8.21  |
| Gly | GGT   | 10.75               | 34.40 | 34.82 | 34.54 | 37.06 | 37.01 | 31.25 | 31.28 |
| Gly | GGC   | 22.22               | 8.32  | 8.18  | 8.46  | 8.88  | 8.62  | 13.43 | 13.59 |
| His | CT    | 10.86               | 14.52 | 14.66 | 14.80 | 14.37 | 14.41 | 15.27 | 14.44 |
| His | CAC   | 15.09               | 3.52  | 3.67  | 3.52  | 6.06  | 6.07  | 7.63  | 6.79  |
| Ile | ATA   | 7.49                | 16.21 | 16.49 | 16.49 | 16.49 | 16.53 | 10.46 | 11.18 |
| Ile | ATT   | 16.00               | 30.73 | 30.59 | 31.15 | 23.81 | 23.87 | 26.16 | 27.46 |
| Ile | ATC   | 20.82               | 4.23  | 4.09  | 3.95  | 8.03  | 8.05  | 11.73 | 9.62  |
| Lys | AAG   | 31.86               | 32.00 | 32.00 | 31.72 | 21.56 | 21.61 | 28.56 | 29.30 |
| Lys | AAA   | 24.44               | 32.00 | 32.14 | 32.14 | 39.59 | 39.69 | 30.11 | 27.18 |
| Leu | TTG   | 12.93               | 32.42 | 32.42 | 32.28 | 16.34 | 16.53 | 17.53 | 22.79 |
| Leu | TTA   | 7.67                | 22.98 | 23.26 | 23.40 | 28.32 | 28.39 | 17.67 | 19.82 |
| Leu | CTG   | 39.64               | 6.06  | 5.92  | 5.78  | 3.95  | 3.81  | 9.61  | 6.65  |
| Leu | CTA   | 7.15                | 5.50  | 5.36  | 5.36  | 10.85 | 10.88 | 9.61  | 5.94  |
| Leu | CTT   | 13.19               | 21.57 | 21.85 | 21.85 | 26.07 | 26.27 | 28.42 | 25.05 |
| Leu | CTC   | 19.59               | 3.52  | 3.67  | 3.38  | 8.60  | 8.48  | 12.72 | 10.90 |
| Met | ATG   | 22.04               | 22.55 | 22.70 | 22.70 | 23.67 | 23.73 | 25.02 | 22.93 |
| Asn | AAT   | 16.96               | 41.73 | 41.73 | 41.87 | 37.76 | 37.86 | 32.52 | 35.95 |
| Asn | AAC   | 19.10               | 8.32  | 8.03  | 8.03  | 16.34 | 16.39 | 19.09 | 14.15 |
| Pro | CCG   | 6.92                | 1.27  | 1.41  | 1.27  | 1.41  | 1.27  | 1.13  | 1.70  |
| Pro | CCA   | 16.92               | 10.15 | 10.01 | 10.01 | 15.64 | 15.68 | 17.39 | 12.03 |
| Pro | CCT   | 17.54               | 16.07 | 16.35 | 16.35 | 19.16 | 19.21 | 16.68 | 19.39 |
| Pro | CCC   | 19.79               | 2.82  | 2.82  | 2.96  | 2.40  | 2.40  | 3.53  | 5.80  |
| Gln | CAG   | 34.23               | 15.51 | 15.79 | 15.93 | 10.71 | 10.74 | 14.85 | 13.87 |
| Gln | CAA   | 12.34               | 17.34 | 16.92 | 16.77 | 22.97 | 23.03 | 18.10 | 18.12 |
| Arg | AGG   | 11.96               | 2.68  | 2.26  | 2.40  | 4.37  | 4.38  | 5.09  | 5.52  |
| Arg | AGA   | 12.17               | 9.44  | 9.59  | 9.59  | 15.78 | 15.82 | 13.57 | 7.93  |
| Arg | CGG   | 11.42               | 1.69  | 1.69  | 1.55  | 0.99  | 0.85  | 0.28  | 1.84  |
| Arg | CGA   | 6.17                | 2.54  | 2.68  | 2.54  | 1.41  | 1.41  | 1.56  | 2.26  |
| Arg | CGT   | 4.54                | 11.98 | 11.84 | 11.70 | 8.31  | 8.19  | 11.17 | 10.90 |

**Supplementary Table S1** (Continued)

| Aa  | Codon | <i>Homo sapiens</i> | 1     | 2     | 3     | 4     | 5     | 6     | 7     |
|-----|-------|---------------------|-------|-------|-------|-------|-------|-------|-------|
| Arg | CGC   | 10.42               | 4.37  | 4.23  | 4.37  | 3.52  | 3.53  | 4.67  | 6.09  |
| Ser | AGT   | 12.13               | 25.23 | 25.66 | 25.80 | 16.77 | 16.67 | 13.86 | 17.55 |
| Ser | AGC   | 19.46               | 6.20  | 6.20  | 5.92  | 3.24  | 3.11  | 5.09  | 4.95  |
| Ser | TCG   | 4.41                | 1.69  | 1.69  | 1.83  | 0.70  | 0.71  | 1.84  | 2.12  |
| Ser | TCA   | 12.21               | 10.01 | 10.01 | 10.15 | 18.04 | 18.08 | 18.95 | 14.58 |
| Ser | TCT   | 15.22               | 21.99 | 21.85 | 21.14 | 21.70 | 21.75 | 20.78 | 24.91 |
| Ser | TCC   | 17.68               | 4.79  | 4.65  | 4.65  | 3.80  | 3.81  | 4.24  | 7.08  |
| Thr | ACG   | 6.05                | 3.24  | 2.82  | 2.96  | 3.38  | 3.39  | 2.83  | 3.54  |
| Thr | ACA   | 15.11               | 19.03 | 18.75 | 18.89 | 31.56 | 31.36 | 28.56 | 20.52 |
| Thr | ACT   | 13.12               | 27.49 | 27.49 | 27.21 | 32.69 | 32.49 | 29.27 | 32.84 |
| Thr | ACC   | 18.89               | 6.91  | 6.91  | 6.63  | 6.62  | 6.64  | 9.33  | 11.32 |
| Val | GTG   | 28.12               | 20.72 | 20.58 | 20.58 | 12.40 | 12.43 | 15.98 | 17.55 |
| Val | GTA   | 7.08                | 16.63 | 16.07 | 16.07 | 19.30 | 19.21 | 18.52 | 17.55 |
| Val | GTT   | 11.03               | 55.26 | 55.68 | 56.10 | 41.14 | 41.11 | 33.37 | 38.92 |
| Val | GTC   | 14.46               | 6.63  | 6.77  | 6.48  | 11.41 | 11.44 | 13.86 | 18.12 |
| Trp | TGG   | 13.17               | 12.26 | 12.26 | 12.26 | 10.99 | 11.02 | 10.89 | 11.46 |
| Tyr | TAT   | 12.19               | 45.53 | 45.53 | 45.95 | 29.31 | 29.24 | 26.01 | 31.71 |
| Tyr | TAC   | 15.31               | 8.46  | 8.46  | 8.18  | 17.89 | 17.94 | 19.79 | 17.41 |

Abbreviations: ORF, open reading frame.

Columns numbered 1 to 7 refer to the following:

<sup>1</sup>HCoV-OC43/human/USA/1987; GenBank: KF530083.1; ID = AGT51637.1; taxon:31631.

<sup>2</sup>HCoV-OC43/human/USA/1990; GenBank: KF530088.1; ID = AGT51687.1; taxon:31631.

<sup>3</sup>HCoV-OC43/UK/London/2011; GenBank: KU131570.1; ID = AMK59674.1; taxon:31631.

<sup>4</sup>SARS-CoV-2/Wuhan-Hu-1/2019; GenBank: MN908947.3; ID = QHD43415.1; taxon:2697049.

<sup>5</sup>SARS-CoV-2/WA-UW239//2020/USA; GenBank: MT251975.1; ID = QIQ68493.1 taxon:2697049.

<sup>6</sup>SARS coronavirus ZJ0301/2003; GenBank: DQ182595.1; ID = ABA02248.1; taxon:344702.

<sup>7</sup>MERS-CoV/THA/CU/2015; GenBank: KT225476.2; ID = ALD51902.1; taxon:1335626.

Further details in ► **Table 1**.
